# Supplementary material for: Risk attitudes and personality traits of entrepreneurs and venture team members
Source: PubMed Central journal article supplement (PMC6731656; doi:10.1073/pnas.1908375116), 2019-08-19
Supplement: pnas.1908375116.sapp.pdf [file pnas.1908375116.sapp.pdf]

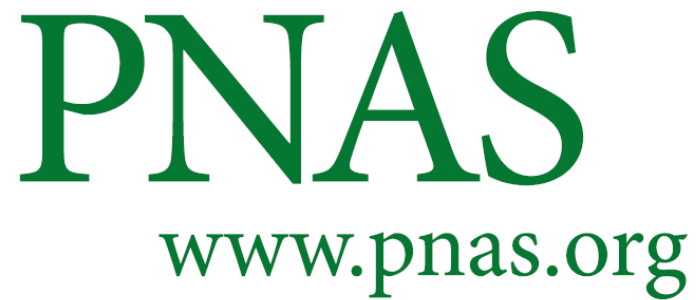

## Supplementary Information for

Risk Attitudes and Personality Traits of Entrepreneurs and Venture Team Members

Sari Pekkala Kerr, William R. Kerr, Margaret Dalton

William Kerr

Email: [wkerr@hbs.edu](mailto:wkerr@hbs.edu)

### **This PDF file includes:**

Tables S1 to S8c  
Survey Instrument

Table S1. Descriptive statistics for CIC locations

|                                              | All     | 50 Milk | One Broadway | 101 Main | St. Louis |
|----------------------------------------------|---------|---------|--------------|----------|-----------|
| <b>Year opened</b>                           |         | 2014    | 2001         | 2012     | 2014      |
| <b>Individuals</b>                           | 5,645   | 1,236   | 2,467        | 464      | 1,478     |
| Heads                                        | 1,168   | 346     | 577          | 59       | 186       |
| non-Heads                                    | 4,477   | 890     | 1,890        | 405      | 1,292     |
| <b>Total survey respondents</b>              | 1,222   | 199     | 493          | 86       | 348       |
| Response rate                                | 21.6    | 16.1    | 20.0         | 18.5     | 23.5      |
| <b>Footprint (sq. ft.)</b>                   | 422,177 | 93,410  | 155,147      | 52,465   | 121,155   |
| <b>Average firm tenure at CIC in years</b>   | 2.8     | 2.3     | 4.4          | 4.4      | 1.6       |
| <b>Average firm size at CIC in employees</b> | 4.8     | 3.6     | 4.6          | 4.6      | 7.9       |
| <b>Percent of firms that are nonprofits</b>  | 10.5    | 19.1    | 7.1          | 7.1      | 10.0      |

Note: One Broadway is the original CIC building at the edge of MIT. Boston-area expansions are 101 Main (one block away from One Broadway) and 50 Milk Street (Boston financial district).

Table S2. Descriptive statistics on core analysis sample by facility

|                                  | All  | 50 Milk | One Broadway | 101 Main | St. Louis |
|----------------------------------|------|---------|--------------|----------|-----------|
| <b>Core analysis sample</b>      | 999  | 182     | 443          | 78       | 293       |
| Percent of sample                |      | 18.2    | 44.3         | 7.8      | 29.3      |
| <b>Core analysis sample</b>      |      |         |              |          |           |
| Percent entrepreneurs            | 18.5 | 12.1    | 21.9         | 10.3     | 19.8      |
| Percent non-founder CEOs/leaders | 13.5 | 14.3    | 13.3         | 2.6      | 16.0      |
| Percent inventor employees       | 11.8 | 7.7     | 15.8         | 9.0      | 9.2       |
| Percent non-inventor employees   | 56.2 | 65.9    | 49.0         | 78.2     | 54.9      |
| Percent aged < 25                | 8.9  | 11.4    | 8.8          | 10.3     | 7.2       |
| Percent aged 25-34               | 37.3 | 37.5    | 35.8         | 47.4     | 36.4      |
| Percent aged 35-44               | 24.3 | 29.0    | 21.0         | 26.9     | 25.8      |
| Percent aged 45-54               | 17.1 | 13.6    | 21.9         | 6.4      | 14.8      |
| Percent aged > 54                | 12.4 | 8.5     | 12.5         | 9.0      | 15.8      |
| Percent women                    | 40.1 | 44.3    | 38.4         | 42.9     | 39.0      |
| Percent doctorate holders        | 18.9 | 8.2     | 25.3         | 11.5     | 17.8      |

Note: See Table S1. Core analysis sample restricted to those respondents classified into one of the four roles and who completed at least the first risk tolerance question that commenced the personality section of the survey.

Table S3a. Descriptive statistics on survey responses by individual's role

|                               | All responses | Core sample | Entrepreneur | Non-founder<br>CEO/leader | Inventor<br>employee | Non-inventor<br>employee |
|-------------------------------|---------------|-------------|--------------|---------------------------|----------------------|--------------------------|
| <b>Respondents</b>            | 1,222         | 999         | 185          | 135                       | 118                  | 561                      |
| <b>Percent of core sample</b> |               |             | 18.5         | 13.5                      | 11.8                 | 56.2                     |
| <b>Female</b>                 | 40.2          | 40.1        | 20.3         | 28.2                      | 23.9                 | 52.9                     |
| <b>Immigrant</b>              | 26.0          | 25.6        | 25.7         | 21.1                      | 44.4                 | 22.7                     |
| <b>Age</b>                    |               |             |              |                           |                      |                          |
| Under 25                      | 8.7           | 8.9         | 2.8          | 3.0                       | 1.7                  | 13.8                     |
| 25-34                         | 37.2          | 37.3        | 17.3         | 24.8                      | 30.8                 | 48.2                     |
| 35-44                         | 24.5          | 24.3        | 24.0         | 30.8                      | 31.6                 | 21.2                     |
| 45-54                         | 17.3          | 17.1        | 28.5         | 23.3                      | 23.1                 | 10.7                     |
| Over 55                       | 12.3          | 12.4        | 27.4         | 18.0                      | 12.8                 | 6.2                      |
| <b>Race and ethnicity</b>     |               |             |              |                           |                      |                          |
| Asian                         | 12.8          | 12.9        | 8.7          | 9.6                       | 23.9                 | 12.7                     |
| African American              | 3.5           | 3.6         | 5.4          | 5.2                       | 0.0                  | 3.4                      |
| Hispanic/Latino               | 5.5           | 5.5         | 5.4          | 4.4                       | 4.3                  | 6.1                      |
| White                         | 73.5          | 73.8        | 74.5         | 75.6                      | 67.5                 | 74.6                     |
| Other responses               | 3.8           | 3.9         | 6.0          | 4.4                       | 3.4                  | 3.2                      |
| <b>Education</b>              |               |             |              |                           |                      |                          |
| BA/MA                         | 75.3          | 75.3        | 64.7         | 61.5                      | 61.0                 | 85.2                     |
| PhD                           | 19.0          | 18.9        | 29.9         | 34.8                      | 37.3                 | 7.5                      |
| Other                         | 5.7           | 5.8         | 5.4          | 3.7                       | 1.7                  | 7.3                      |
| <b>Field of Education</b>     |               |             |              |                           |                      |                          |
| STEM                          | 36.0          | 36.1        | 35.1         | 27.1                      | 70.1                 | 31.4                     |
| Business or economics         | 29.5          | 29.3        | 42.7         | 39.1                      | 11.1                 | 26.4                     |
| Other                         | 34.6          | 34.6        | 22.2         | 33.8                      | 18.8                 | 42.2                     |
| <b>Experience</b>             |               |             |              |                           |                      |                          |
| Prior work in industry        | 62.6          | 62.1        | 82.1         | 69.6                      | 65.3                 | 53.0                     |
| Prior work in a startup       | 47.8          | 47.4        | 89.7         | 23.0                      | 61.0                 | 36.4                     |

Note: We segment the sample into entrepreneurs, non-founder CEOs/leaders, inventor employees, and non-inventor employees as described in the text. Race and ethnicity shares can add up to slightly more or less than 100% due to multiple boxes checked or none reported.

Table S3b. Prevalence of invention and STEM among Entrepreneurs

|                           | Non-Inventor | Inventor | Non-STEM | STEM  |
|---------------------------|--------------|----------|----------|-------|
| <b>Respondents</b>        | 124          | 61       | 120      | 65    |
| <b>Percent of sample</b>  | 67.0         | 33.0     | 64.9     | 35.1  |
| <b>Female</b>             | 23.8         | 13.3     | 23.7     | 14.1  |
| <b>Immigrant</b>          | 22.8         | 31.7     | 24.4     | 28.1  |
| <b>Age</b>                |              |          |          |       |
| Under 25                  | 3.4          | 1.7      | 1.7      | 4.8   |
| 25-34                     | 20.2         | 11.7     | 15.5     | 20.6  |
| 35-44                     | 24.4         | 23.3     | 22.4     | 27.0  |
| 45-54                     | 26.9         | 31.7     | 33.6     | 19.0  |
| Over 55                   | 25.2         | 31.7     | 26.7     | 28.6  |
| <b>Race and ethnicity</b> |              |          |          |       |
| Asian                     | 8.1          | 10.0     | 7.6      | 10.8  |
| African American          | 8.1          | 0.0      | 8.4      | 0.0   |
| Hispanic/Latino           | 5.6          | 5.0      | 6.7      | 3.1   |
| White                     | 72.6         | 78.3     | 73.1     | 76.9  |
| Other responses           | 5.6          | 6.7      | 5.9      | 6.2   |
| <b>Education</b>          |              |          |          |       |
| BA/MA                     | 72.6         | 48.3     | 73.1     | 49.2  |
| PhD                       | 20.2         | 50.0     | 21.8     | 44.6  |
| Other                     | 7.3          | 1.7      | 5.0      | 6.2   |
| <b>Field of Education</b> |              |          |          |       |
| STEM                      | 21.8         | 62.3     | 0.0      | 100.0 |
| Business or economics     | 50.8         | 26.2     | 65.8     | 0.0   |
| Other                     | 27.4         | 11.5     | 34.2     | 0.0   |
| <b>Experience</b>         |              |          |          |       |
| Prior work in industry    | 82.9         | 80.3     | 83.2     | 80.0  |
| Prior work in a startup   | 87.1         | 95.1     | 88.3     | 92.3  |
| Founded 1-2 firms         | 57.3         | 41.0     | 61.7     | 52.3  |
| Founded 3+ firms          | 42.7         | 59.0     | 48.3     | 47.7  |

Note: See Table S3a.

Table S3c. Prevalence of invention and STEM among Non-founder CEOs/leaders

|                           | Non-Inventor | Inventor | Non-STEM | STEM  |
|---------------------------|--------------|----------|----------|-------|
| <b>Respondents</b>        | 102          | 33       | 97       | 36    |
| <b>Percent of sample</b>  | 75.6         | 24.4     | 71.9     | 26.7  |
| <b>Female</b>             | 34.3         | 9.4      | 30.9     | 22.9  |
| <b>Immigrant</b>          | 17.8         | 31.3     | 12.6     | 41.7  |
| <b>Age</b>                |              |          |          |       |
| Under 25                  | 3.0          | 3.1      | 1.1      | 8.3   |
| 25-34                     | 23.8         | 28.1     | 24.2     | 25.0  |
| 35-44                     | 33.7         | 21.9     | 34.7     | 22.2  |
| 45-54                     | 23.8         | 21.9     | 21.1     | 27.8  |
| Over 55                   | 15.8         | 25.0     | 18.9     | 16.7  |
| <b>Race and ethnicity</b> |              |          |          |       |
| Asian                     | 6.9          | 18.2     | 7.2      | 13.9  |
| African American          | 6.9          | 0.0      | 6.2      | 2.8   |
| Hispanic/Latino           | 3.9          | 6.1      | 2.1      | 11.1  |
| White                     | 76.5         | 72.7     | 77.3     | 72.2  |
| Other responses           | 3.9          | 6.1      | 6.2      | 0.0   |
| <b>Education</b>          |              |          |          |       |
| BA/MA                     | 68.6         | 39.4     | 68.0     | 44.4  |
| PhD                       | 27.5         | 57.6     | 29.9     | 50.0  |
| Other                     | 3.9          | 3.0      | 2.1      | 5.6   |
| <b>Field of Education</b> |              |          |          |       |
| STEM                      | 18.8         | 53.1     | 0.0      | 100.0 |
| Business or economics     | 42.6         | 28.1     | 53.6     | 0.0   |
| Other                     | 38.6         | 18.8     | 46.4     | 0.0   |
| <b>Experience</b>         |              |          |          |       |
| Prior work in industry    | 71.6         | 63.6     | 72.2     | 63.9  |
| Prior work in a startup   | 17.6         | 39.4     | 22.7     | 22.2  |

Note: See Table S3a.

Table S3d. Prevalence of invention and STEM among Employees

|                           | Non-Inventor | Inventor | Non-STEM | STEM  |
|---------------------------|--------------|----------|----------|-------|
| <b>Respondents</b>        | 561          | 118      | 414      | 256   |
| <b>Percent of sample</b>  | 82.6         | 17.4     | 61.0     | 37.7  |
| <b>Female</b>             | 52.9         | 23.9     | 55.9     | 34.4  |
| <b>Immigrant</b>          | 22.7         | 44.4     | 20.5     | 37.0  |
| <b>Age</b>                |              |          |          |       |
| Under 25                  | 13.8         | 1.7      | 11.6     | 11.8  |
| 25-34                     | 48.2         | 30.8     | 46.6     | 42.0  |
| 35-44                     | 21.2         | 31.6     | 21.4     | 25.9  |
| 45-54                     | 10.7         | 23.1     | 11.8     | 14.9  |
| Over 55                   | 6.2          | 12.8     | 8.6      | 5.5   |
| <b>Race and ethnicity</b> |              |          |          |       |
| Asian                     | 12.7         | 23.9     | 10.0     | 22.7  |
| African American          | 3.4          | 0.0      | 3.4      | 1.6   |
| Hispanic/Latino           | 6.1          | 4.3      | 7.0      | 3.9   |
| White                     | 74.6         | 67.5     | 77.2     | 67.1  |
| Other responses           | 3.2          | 3.4      | 2.7      | 3.9   |
| <b>Education</b>          |              |          |          |       |
| BA/MA                     | 85.2         | 61.0     | 89.4     | 68.4  |
| PhD                       | 7.5          | 37.3     | 5.1      | 25.4  |
| Other                     | 7.3          | 1.7      | 5.6      | 6.3   |
| <b>Field of Education</b> |              |          |          |       |
| STEM                      | 31.4         | 70.1     | 0.0      | 100.0 |
| Business or economics     | 26.4         | 11.1     | 38.3     | 0.0   |
| Other                     | 42.2         | 18.8     | 61.7     | 0.0   |
| <b>Experience</b>         |              |          |          |       |
| Prior work in industry    | 53.0         | 65.3     | 51.2     | 60.5  |
| Prior work in a startup   | 36.4         | 61.0     | 37.5     | 46.7  |

Note: See Table S3a.

Table S4. Survey questions used to calculate personality traits

| Trait                  | Survey Questions                                                                                                                                                                                                                                                                                                                   | Reverse | Scale  |
|------------------------|------------------------------------------------------------------------------------------------------------------------------------------------------------------------------------------------------------------------------------------------------------------------------------------------------------------------------------|---------|--------|
| <i>A. Risk</i>         |                                                                                                                                                                                                                                                                                                                                    |         |        |
| Enjoy Risk             | How much do you typically enjoy taking risks?                                                                                                                                                                                                                                                                                      |         | [1,10] |
| Financial Risk         | Some activities involve a "financial" risk, such as starting a business, investing, or gambling and betting — that is, there is a risk of losing money or other assets. In general, what is your propensity for accepting financial risks?                                                                                         |         | [1,10] |
| Lottery                | All respondents can either choose to receive a \$5 Amazon gift card, or to participate in a drawing for a \$2,000 gift card of choice. We expect to receive around 1000 participants in the drawing. Please make your choice: 1) Please send me a \$5 Amazon gift card. 2) Please enter me in a drawing for the \$2,000 gift card. |         | [1,2]  |
| <i>B. Big 5</i>        |                                                                                                                                                                                                                                                                                                                                    |         |        |
| Extraversion           | I am talkative                                                                                                                                                                                                                                                                                                                     |         | [1,5]  |
|                        | I am reserved                                                                                                                                                                                                                                                                                                                      | Yes     | [1,5]  |
| Conscientiousness      | I am social and outgoing                                                                                                                                                                                                                                                                                                           |         | [1,5]  |
|                        | I am very thorough in my actions                                                                                                                                                                                                                                                                                                   |         | [1,5]  |
| Openness               | I am often lazy                                                                                                                                                                                                                                                                                                                    | Yes     | [1,5]  |
|                        | I do things efficiently                                                                                                                                                                                                                                                                                                            |         | [1,5]  |
| Neuroticism            | I am original, come up with new ideas                                                                                                                                                                                                                                                                                              |         | [1,5]  |
|                        | I have an active imagination                                                                                                                                                                                                                                                                                                       |         | [1,5]  |
| Agreeableness          | I value artistic, aesthetic experiences                                                                                                                                                                                                                                                                                            |         | [1,5]  |
|                        | I am relaxed, handle stress well                                                                                                                                                                                                                                                                                                   | Yes     | [1,5]  |
| Agreeableness          | I get nervous easily and worry                                                                                                                                                                                                                                                                                                     |         | [1,5]  |
|                        | I have a forgiving nature                                                                                                                                                                                                                                                                                                          |         | [1,5]  |
| Agreeableness          | I am kind and considerate to others                                                                                                                                                                                                                                                                                                |         | [1,5]  |
|                        |                                                                                                                                                                                                                                                                                                                                    |         | [1,5]  |
| <i>C. Other Traits</i> |                                                                                                                                                                                                                                                                                                                                    |         |        |
| Self-Efficacy          | If I work hard, I can successfully start a business                                                                                                                                                                                                                                                                                |         | [1,5]  |
|                        | Overall, my skills and abilities will help me start a business                                                                                                                                                                                                                                                                     |         | [1,5]  |
|                        | My past experience will be very valuable in starting a business                                                                                                                                                                                                                                                                    |         | [1,5]  |
| Internal LOC           | I am confident I can put in the effort needed to start a business                                                                                                                                                                                                                                                                  |         | [1,5]  |
|                        | I believe that I am primarily responsible for my own successes and failures                                                                                                                                                                                                                                                        |         | [1,5]  |
| Need for Achievement   | I feel a great deal of pride when I complete a project successfully                                                                                                                                                                                                                                                                |         | [1,5]  |
|                        | I have a desire to achieve positive results even if it requires a lot of additional effort                                                                                                                                                                                                                                         |         | [1,5]  |
| Innovativeness         | I surprise people with my novel ideas                                                                                                                                                                                                                                                                                              |         | [1,5]  |
|                        | People ask me for help in creative activities                                                                                                                                                                                                                                                                                      |         | [1,5]  |
|                        | I get more satisfaction from mastering a skill than developing a new idea.                                                                                                                                                                                                                                                         |         | [1,5]  |
|                        | I prefer work that requires original thinking                                                                                                                                                                                                                                                                                      |         | [1,5]  |
|                        | I like a job which demands skill and practice rather than inventiveness                                                                                                                                                                                                                                                            | Yes     | [1,5]  |
|                        | I am not a very creative person                                                                                                                                                                                                                                                                                                    | Yes     | [1,5]  |

Table S5a: Personality traits by position

|                           | Core sample      | Entrepreneur     | Non-founder<br>CEO/leader | Inventor<br>employee | Non-inventor<br>employee |
|---------------------------|------------------|------------------|---------------------------|----------------------|--------------------------|
| <i>A. Risk Tolerance</i>  |                  |                  |                           |                      |                          |
| Enjoy Risk                | 6.92<br>(1.95)   | 8.02<br>(1.55)   | 7.41<br>(1.64)            | 6.86<br>(1.83)       | 6.44<br>(1.99)           |
| Financial Risk            | 5.75<br>(2.28)   | 7.39<br>(1.96)   | 6.37<br>(2.13)            | 5.88<br>(2.01)       | 5.03<br>(2.14)           |
| Opt into Lottery (% yes)  | 63.43<br>(48.19) | 73.65<br>(44.14) | 71.77<br>(45.19)          | 62.50<br>(48.62)     | 58.48<br>(49.32)         |
| <i>B. Big 5 Traits</i>    |                  |                  |                           |                      |                          |
| Openness                  | 3.88<br>(0.73)   | 4.15<br>(0.72)   | 3.96<br>(0.75)            | 3.86<br>(0.72)       | 3.79<br>(0.71)           |
| Conscientiousness         | 3.90<br>(0.68)   | 3.92<br>(0.75)   | 3.93<br>(0.72)            | 3.79<br>(0.66)       | 3.91<br>(0.65)           |
| Extraversion              | 3.37<br>(0.97)   | 3.51<br>(0.93)   | 3.36<br>(1.00)            | 3.25<br>(0.92)       | 3.35<br>(0.98)           |
| Agreeableness             | 4.02<br>(0.75)   | 4.05<br>(0.76)   | 3.98<br>(0.71)            | 3.88<br>(0.82)       | 4.06<br>(0.72)           |
| Neuroticism               | 2.54<br>(0.91)   | 2.26<br>(0.86)   | 2.50<br>(0.91)            | 2.44<br>(0.85)       | 2.66<br>(0.90)           |
| <i>C. Other Traits</i>    |                  |                  |                           |                      |                          |
| Self-efficacy             | 3.96<br>(0.90)   | 4.59<br>(0.57)   | 4.32<br>(0.65)            | 3.90<br>(0.85)       | 3.67<br>(0.92)           |
| Internal Locus of Control | 4.30<br>(0.80)   | 4.56<br>(0.70)   | 4.40<br>(0.76)            | 4.16<br>(0.90)       | 4.22<br>(0.79)           |
| Need for Achievement      | 4.47<br>(0.61)   | 4.65<br>(0.57)   | 4.52<br>(0.60)            | 4.37<br>(0.74)       | 4.42<br>(0.58)           |
| Innovativeness            | 3.52<br>(0.63)   | 3.79<br>(0.57)   | 3.63<br>(0.63)            | 3.67<br>(0.57)       | 3.37<br>(0.62)           |

Sample: See Table S3.



Table S5b: Personality traits by position

|                           | Male<br>entrepreneurs | Female<br>entrepreneurs | Entrepreneur<br>with 1-2 firms | Entrepreneurs<br>with 3+ firms | Inventor<br>entrepreneurs | Non-inventor<br>entrepreneurs |
|---------------------------|-----------------------|-------------------------|--------------------------------|--------------------------------|---------------------------|-------------------------------|
| <i>A. Risk Tolerance</i>  |                       |                         |                                |                                |                           |                               |
| Enjoy Risk                | 8.14<br>(1.46)        | 7.57<br>(1.85)          | 7.73<br>(1.57)                 | 8.34<br>(1.48)                 | 8.13<br>(1.54)            | 7.97<br>(1.56)                |
| Financial Risk            | 7.57<br>(1.85)        | 6.67<br>(2.26)          | 6.96<br>(2.06)                 | 7.85<br>(1.75)                 | 7.36<br>(1.91)            | 7.40<br>(2.00)                |
| Opt into Lottery (% yes)  | 74.81<br>(43.58)      | 66.67<br>(47.87)        | 72.41<br>(44.95)               | 75.00<br>(43.57)               | 70.91<br>(45.84)          | 75.00<br>(43.50)              |
| <i>B. Big 5 Traits</i>    |                       |                         |                                |                                |                           |                               |
| Openness                  | 4.12<br>(0.71)        | 4.26<br>(0.77)          | 4.11<br>(0.77)                 | 4.20<br>(0.65)                 | 4.21<br>(0.73)            | 4.12<br>(0.71)                |
| Conscientiousness         | 3.90<br>(0.75)        | 4.06<br>(0.73)          | 3.85<br>(0.74)                 | 4.00<br>(0.75)                 | 3.91<br>(0.85)            | 3.93<br>(0.70)                |
| Extraversion              | 3.49<br>(0.93)        | 3.52<br>(0.94)          | 3.47<br>(0.93)                 | 3.55<br>(0.93)                 | 3.39<br>(1.01)            | 3.56<br>(0.89)                |
| Agreeableness             | 4.03<br>(0.74)        | 4.17<br>(0.80)          | 4.11<br>(0.73)                 | 3.98<br>(0.79)                 | 4.01<br>(0.72)            | 4.07<br>(0.78)                |
| Neuroticism               | 2.16<br>(0.80)        | 2.61<br>(0.98)          | 2.40<br>(0.88)                 | 2.10<br>(0.83)                 | 2.16<br>(0.81)            | 2.31<br>(0.89)                |
| <i>C. Other Traits</i>    |                       |                         |                                |                                |                           |                               |
| Self-efficacy             | 4.61<br>(0.56)        | 4.53<br>(0.57)          | 4.50<br>(0.66)                 | 4.70<br>(0.43)                 | 4.56<br>(0.68)            | 4.61<br>(0.51)                |
| Internal Locus of Control | 4.54<br>(0.73)        | 4.61<br>(0.60)          | 4.51<br>(0.78)                 | 4.62<br>(0.60)                 | 4.50<br>(0.81)            | 4.59<br>(0.64)                |
| Need for Achievement      | 4.63<br>(0.59)        | 4.71<br>(0.48)          | 4.62<br>(0.61)                 | 4.68<br>(0.52)                 | 4.65<br>(0.66)            | 4.65<br>(0.52)                |
| Innovativeness            | 3.80<br>(0.56)        | 3.74<br>(0.63)          | 3.70<br>(0.61)                 | 3.90<br>(0.50)                 | 3.99<br>(0.53)            | 3.69<br>(0.57)                |

Sample: See Table S5a.

Table S6a. Multivariate regressions for risk tolerance

|                                 | Enjoy general risk,<br>measured on 5-<br>point scale | Enjoy financial risk,<br>measured on 5-<br>point scale | Entered the lottery<br>rather than taking<br>gift card |
|---------------------------------|------------------------------------------------------|--------------------------------------------------------|--------------------------------------------------------|
| Entrepreneur                    | 0.648***<br>(0.0822)                                 | 0.863***<br>(0.0961)                                   | 0.115**<br>(0.0489)                                    |
| Non-founder CEO/leader          | 0.330***<br>(0.0913)                                 | 0.471***<br>(0.106)                                    | 0.0927*<br>(0.0534)                                    |
| Inventor employee               | 0.121<br>(0.104)                                     | 0.262**<br>(0.108)                                     | 0.0502<br>(0.0519)                                     |
| Female                          | -0.258***<br>(0.0667)                                | -0.472***<br>(0.0736)                                  | -0.00482<br>(0.0355)                                   |
| Fulltime with company           | -0.0181<br>(0.0947)                                  | -0.0167<br>(0.118)                                     | -0.00255<br>(0.0530)                                   |
| Young (Under 35 years old)      | -0.0166<br>(0.0663)                                  | -0.0558<br>(0.0803)                                    | -0.0920**<br>(0.0375)                                  |
| Immigrant                       | 0.0851<br>(0.0701)                                   | 0.244***<br>(0.0767)                                   | 0.0212<br>(0.0405)                                     |
| Doctorate degree                | -0.0142<br>(0.173)                                   | 0.292*<br>(0.173)                                      | 0.0591<br>(0.0796)                                     |
| Bachelors or masters degree     | -0.0423<br>(0.154)                                   | 0.198<br>(0.167)                                       | 0.0278<br>(0.0752)                                     |
| White                           | 0.000372<br>(0.0687)                                 | 0.128<br>(0.0830)                                      | 0.0924**<br>(0.0437)                                   |
| Highest degree in STEM field    | 0.00670<br>(0.0776)                                  | 0.0971<br>(0.0757)                                     | -0.0894**<br>(0.0408)                                  |
| Highest degree in business/econ | 0.173**<br>(0.0779)                                  | 0.371***<br>(0.0862)                                   | -0.0241<br>(0.0396)                                    |
| Prior industry experience       | -0.0154<br>(0.0683)                                  | -0.0560<br>(0.0732)                                    | -0.0123<br>(0.0349)                                    |
| Constant                        | 3.639***<br>(0.203)                                  | 2.640***<br>(0.203)                                    | 0.581***<br>(0.0990)                                   |
| Observations                    | 948                                                  | 945                                                    | 874                                                    |
| R-squared                       | 0.126                                                | 0.230                                                  | 0.040                                                  |

Note: All explanatory variables take the form of indicator variables. Indicators for entrepreneur, non-founder CEOs/leaders, and inventor employees are measured relative to non-inventor employees. Standard errors are clustered by firm. \*\*\* p<0.01, \*\* p<0.05, \* p<0.1

Table S6b. Multivariate regressions for Big-5 traits

|                                 | Openness,<br>measured on 5-<br>point scale | Conscientiousness,<br>measured on 5-<br>point scale | Extraversion,<br>measured on 5-<br>point scale | Agreeableness,<br>measured on 5-<br>point scale | Neuroticism,<br>measured on 5-<br>point scale |
|---------------------------------|--------------------------------------------|-----------------------------------------------------|------------------------------------------------|-------------------------------------------------|-----------------------------------------------|
| Entrepreneur                    | 0.412***<br>(0.0723)                       | 0.0696<br>(0.0740)                                  | 0.220**<br>(0.0949)                            | 0.0871<br>(0.0758)                              | -0.238***<br>(0.0891)                         |
| Non-founder CEO/leader          | 0.199**<br>(0.0828)                        | 0.0831<br>(0.0777)                                  | 0.0306<br>(0.103)                              | -0.0233<br>(0.0730)                             | -0.00499<br>(0.102)                           |
| Inventor employee               | 0.0553<br>(0.0880)                         | -0.0684<br>(0.0797)                                 | 0.0957<br>(0.115)                              | -0.120<br>(0.0849)                              | -0.105<br>(0.107)                             |
| Female                          | 0.000124<br>(0.0539)                       | 0.227***<br>(0.0485)                                | 0.160**<br>(0.0657)                            | 0.120**<br>(0.0531)                             | 0.313***<br>(0.0646)                          |
| Fulltime with company           | 0.134<br>(0.0865)                          | 0.0164<br>(0.0720)                                  | 0.0163<br>(0.0898)                             | 0.0919<br>(0.0860)                              | 0.0610<br>(0.0970)                            |
| Young (Under 35 years old)      | -0.00718<br>(0.0543)                       | 0.0193<br>(0.0459)                                  | -0.0651<br>(0.0691)                            | 0.0483<br>(0.0541)                              | 0.171**<br>(0.0688)                           |
| Immigrant                       | -0.0198<br>(0.0560)                        | 0.0435<br>(0.0512)                                  | 0.0642<br>(0.0771)                             | -0.0414<br>(0.0581)                             | -0.0724<br>(0.0726)                           |
| Doctorate degree                | 0.0134<br>(0.111)                          | 0.0362<br>(0.120)                                   | -0.182<br>(0.152)                              | 0.140<br>(0.137)                                | 0.0288<br>(0.132)                             |
| Bachelors or masters degree     | -0.0217<br>(0.109)                         | -0.0115<br>(0.105)                                  | -0.266*<br>(0.142)                             | 0.107<br>(0.128)                                | 0.103<br>(0.119)                              |
| White                           | 0.0257<br>(0.0544)                         | 0.0571<br>(0.0516)                                  | -0.0186<br>(0.0741)                            | -0.0250<br>(0.0589)                             | 0.00139<br>(0.0697)                           |
| Highest degree in STEM field    | -0.118**<br>(0.0584)                       | -0.0121<br>(0.0590)                                 | -0.411***<br>(0.0840)                          | -0.122*<br>(0.0642)                             | -0.00472<br>(0.0754)                          |
| Highest degree in business/econ | -0.273***<br>(0.0670)                      | -0.0143<br>(0.0620)                                 | -0.0142<br>(0.0839)                            | -0.124*<br>(0.0715)                             | -0.0959<br>(0.0832)                           |
| Prior industry experience       | -0.0386<br>(0.0546)                        | 0.0858*<br>(0.0466)                                 | -0.153**<br>(0.0687)                           | -0.0487<br>(0.0515)                             | 0.0171<br>(0.0656)                            |
| Constant                        | 3.817***<br>(0.137)                        | 3.666***<br>(0.132)                                 | 3.724***<br>(0.169)                            | 3.905***<br>(0.159)                             | 2.302***<br>(0.164)                           |
| Observations                    | 911                                        | 914                                                 | 913                                            | 915                                             | 916                                           |
| R-squared                       | 0.062                                      | 0.033                                               | 0.060                                          | 0.026                                           | 0.077                                         |

Note: See Table S6a.

Table S6c. Multivariate regressions for additional entrepreneurial traits

|                                 | Self efficacy,<br>measured on 5-<br>point scale | Internal LOC,<br>measured on 5-<br>point scale | Need for<br>Achievement, on 5-<br>point scale | Innovativeness,<br>measured on 5-<br>point scale |
|---------------------------------|-------------------------------------------------|------------------------------------------------|-----------------------------------------------|--------------------------------------------------|
| Entrepreneur                    | 0.816***<br>(0.0737)                            | 0.310***<br>(0.0770)                           | 0.289***<br>(0.0599)                          | 0.374***<br>(0.0581)                             |
| Non-founder CEO/leader          | 0.548***<br>(0.0783)                            | 0.189**<br>(0.0849)                            | 0.164**<br>(0.0638)                           | 0.187***<br>(0.0697)                             |
| Inventor employee               | 0.153<br>(0.106)                                | -0.0138<br>(0.106)                             | 0.00948<br>(0.0808)                           | 0.208***<br>(0.0616)                             |
| Female                          | -0.160**<br>(0.0619)                            | 0.0764<br>(0.0578)                             | 0.148***<br>(0.0424)                          | -0.130***<br>(0.0463)                            |
| Fulltime with company           | -0.108<br>(0.0828)                              | 0.0554<br>(0.0856)                             | 0.0857<br>(0.0667)                            | 0.0897<br>(0.0670)                               |
| Young (Under 35 years old)      | 0.0520<br>(0.0690)                              | -0.112**<br>(0.0567)                           | -0.0478<br>(0.0450)                           | -0.0267<br>(0.0446)                              |
| Immigrant                       | 0.0736<br>(0.0603)                              | 0.0256<br>(0.0645)                             | -0.0221<br>(0.0527)                           | -0.0256<br>(0.0483)                              |
| Doctorate degree                | 0.315*<br>(0.175)                               | -0.174<br>(0.122)                              | -0.110<br>(0.0969)                            | 0.258***<br>(0.0997)                             |
| Bachelors or masters degree     | 0.182<br>(0.174)                                | -0.114<br>(0.105)                              | -0.0280<br>(0.0809)                           | 0.141<br>(0.0959)                                |
| White                           | -0.0191<br>(0.0638)                             | 0.0663<br>(0.0598)                             | 0.0653<br>(0.0540)                            | 0.0885*<br>(0.0517)                              |
| Highest degree in STEM field    | 0.0454<br>(0.0674)                              | 0.0775<br>(0.0689)                             | 0.0317<br>(0.0521)                            | -0.0418<br>(0.0488)                              |
| Highest degree in business/econ | 0.197**<br>(0.0804)                             | 0.104<br>(0.0679)                              | -0.0639<br>(0.0555)                           | -0.127**<br>(0.0562)                             |
| Prior industry experience       | 0.0605<br>(0.0610)                              | 0.0225<br>(0.0620)                             | -0.00569<br>(0.0430)                          | -0.0360<br>(0.0438)                              |
| Constant                        | 3.530***<br>(0.197)                             | 4.183***<br>(0.146)                            | 4.284***<br>(0.113)                           | 3.255***<br>(0.114)                              |
| Observations                    | 911                                             | 916                                            | 915                                           | 905                                              |
| R-squared                       | 0.196                                           | 0.043                                          | 0.046                                         | 0.107                                            |

Note: See Table S6a.

Table S7a. Extensions on Table S6a

|                                              | Enjoy general risk,<br>measured on 5-<br>point scale | Enjoy financial risk,<br>measured on 5-<br>point scale | Entered the lottery<br>rather than taking<br>gift card |
|----------------------------------------------|------------------------------------------------------|--------------------------------------------------------|--------------------------------------------------------|
| A. Baseline outcomes                         |                                                      |                                                        |                                                        |
| Entrepreneur                                 | 0.648***<br>(0.0822)                                 | 0.863***<br>(0.0961)                                   | 0.115**<br>(0.0489)                                    |
| Non-founder CEO/leader                       | 0.330***<br>(0.0913)                                 | 0.471***<br>(0.106)                                    | 0.0927*<br>(0.0534)                                    |
| Inventor employee                            | 0.121<br>(0.104)                                     | 0.262**<br>(0.108)                                     | 0.0502<br>(0.0519)                                     |
| Observations                                 | 948                                                  | 945                                                    | 874                                                    |
| R-squared                                    | 0.126                                                | 0.230                                                  | 0.040                                                  |
| B. Sample excluding firms with 25+ employees |                                                      |                                                        |                                                        |
| Entrepreneur                                 | 0.653***<br>(0.0985)                                 | 0.882***<br>(0.116)                                    | 0.139**<br>(0.0566)                                    |
| Non-founder CEO/leader                       | 0.401***<br>(0.107)                                  | 0.486***<br>(0.125)                                    | 0.103*<br>(0.0604)                                     |
| Inventor employee                            | 0.0961<br>(0.117)                                    | 0.240*<br>(0.131)                                      | 0.0826<br>(0.0673)                                     |
| Observations                                 | 657                                                  | 656                                                    | 602                                                    |
| R-squared                                    | 0.158                                                | 0.241                                                  | 0.030                                                  |
| C. Sample focusing on non-founder CEOs       |                                                      |                                                        |                                                        |
| Entrepreneur                                 | 0.640***<br>(0.0874)                                 | 0.907***<br>(0.100)                                    | 0.117**<br>(0.0516)                                    |
| Non-founder CEO                              | 0.376***<br>(0.0964)                                 | 0.513***<br>(0.117)                                    | 0.0843<br>(0.0577)                                     |
| Inventor employee                            | 0.117<br>(0.105)                                     | 0.270**<br>(0.109)                                     | 0.0481<br>(0.0520)                                     |
| Observations                                 | 894                                                  | 891                                                    | 822                                                    |
| R-squared                                    | 0.121                                                | 0.235                                                  | 0.042                                                  |

Note: See Table S6a. Estimations include unreported explanatory variables.

Table S7b. Extensions on Table S6b

|                                              | Openness,<br>measured on 5-<br>point scale | Conscientiousness,<br>measured on 5-<br>point scale | Extraversion,<br>measured on 5-<br>point scale | Agreeableness,<br>measured on 5-<br>point scale | Neuroticism,<br>measured on 5-<br>point scale |
|----------------------------------------------|--------------------------------------------|-----------------------------------------------------|------------------------------------------------|-------------------------------------------------|-----------------------------------------------|
| A. Baseline outcomes                         |                                            |                                                     |                                                |                                                 |                                               |
| Entrepreneur                                 | 0.412***<br>(0.0723)                       | 0.0696<br>(0.0740)                                  | 0.220**<br>(0.0949)                            | 0.0871<br>(0.0758)                              | -0.238***<br>(0.0891)                         |
| Non-founder CEO/leader                       | 0.199**<br>(0.0828)                        | 0.0831<br>(0.0777)                                  | 0.0306<br>(0.103)                              | -0.0233<br>(0.0730)                             | -0.00499<br>(0.102)                           |
| Inventor employee                            | 0.0553<br>(0.0880)                         | -0.0684<br>(0.0797)                                 | 0.0957<br>(0.115)                              | -0.120<br>(0.0849)                              | -0.105<br>(0.107)                             |
| Observations                                 | 911                                        | 914                                                 | 913                                            | 915                                             | 916                                           |
| R-squared                                    | 0.062                                      | 0.033                                               | 0.060                                          | 0.026                                           | 0.077                                         |
| B. Sample excluding firms with 25+ employees |                                            |                                                     |                                                |                                                 |                                               |
| Entrepreneur                                 | 0.501***<br>(0.0812)                       | 0.0850<br>(0.0824)                                  | 0.287**<br>(0.114)                             | 0.0846<br>(0.0902)                              | -0.214**<br>(0.108)                           |
| Non-founder CEO/leader                       | 0.279***<br>(0.0895)                       | 0.0985<br>(0.0862)                                  | 0.00766<br>(0.120)                             | 0.0150<br>(0.0842)                              | -0.0159<br>(0.114)                            |
| Inventor employee                            | 0.119<br>(0.106)                           | 0.0128<br>(0.0892)                                  | 0.0966<br>(0.140)                              | -0.0267<br>(0.113)                              | -0.176<br>(0.134)                             |
| Observations                                 | 630                                        | 632                                                 | 631                                            | 633                                             | 634                                           |
| R-squared                                    | 0.088                                      | 0.039                                               | 0.085                                          | 0.025                                           | 0.079                                         |
| C. Sample focusing on non-founder CEOs       |                                            |                                                     |                                                |                                                 |                                               |
| Entrepreneur                                 | 0.387***<br>(0.0795)                       | 0.0698<br>(0.0767)                                  | 0.192*<br>(0.101)                              | 0.0679<br>(0.0801)                              | -0.265***<br>(0.0943)                         |
| Non-founder CEO                              | 0.253***<br>(0.0830)                       | 0.106<br>(0.0834)                                   | 0.0942<br>(0.112)                              | -0.0124<br>(0.0782)                             | 0.0156<br>(0.111)                             |
| Inventor employee                            | 0.0544<br>(0.0886)                         | -0.0638<br>(0.0797)                                 | 0.0801<br>(0.118)                              | -0.128<br>(0.0855)                              | -0.0942<br>(0.107)                            |
| Observations                                 | 856                                        | 859                                                 | 858                                            | 860                                             | 862                                           |
| R-squared                                    | 0.059                                      | 0.032                                               | 0.056                                          | 0.025                                           | 0.086                                         |

Note: See Table S6a. Estimations include unreported explanatory variables.

Table S7c. Extensions on Table S6c

|                                              | Self efficacy,<br>measured on 5-<br>point scale | Internal LOC,<br>measured on 5-<br>point scale | Need for<br>Achievement, on 5-<br>point scale | Innovativeness,<br>measured on 5-<br>point scale |
|----------------------------------------------|-------------------------------------------------|------------------------------------------------|-----------------------------------------------|--------------------------------------------------|
| A. Baseline outcomes                         |                                                 |                                                |                                               |                                                  |
| Entrepreneur                                 | 0.816***<br>(0.0737)                            | 0.310***<br>(0.0770)                           | 0.289***<br>(0.0599)                          | 0.374***<br>(0.0581)                             |
| Non-founder CEO/leader                       | 0.548***<br>(0.0783)                            | 0.189**<br>(0.0849)                            | 0.164**<br>(0.0638)                           | 0.187***<br>(0.0697)                             |
| Inventor employee                            | 0.153<br>(0.106)                                | -0.0138<br>(0.106)                             | 0.00948<br>(0.0808)                           | 0.208***<br>(0.0616)                             |
| Observations                                 | 911                                             | 916                                            | 915                                           | 905                                              |
| R-squared                                    | 0.196                                           | 0.043                                          | 0.046                                         | 0.107                                            |
| B. Sample excluding firms with 25+ employees |                                                 |                                                |                                               |                                                  |
| Entrepreneur                                 | 0.818***<br>(0.0818)                            | 0.295***<br>(0.0922)                           | 0.339***<br>(0.0699)                          | 0.371***<br>(0.0677)                             |
| Non-founder CEO/leader                       | 0.558***<br>(0.0857)                            | 0.232**<br>(0.0956)                            | 0.241***<br>(0.0715)                          | 0.213***<br>(0.0778)                             |
| Inventor employee                            | 0.0890<br>(0.122)                               | -0.123<br>(0.138)                              | 0.0639<br>(0.106)                             | 0.217***<br>(0.0759)                             |
| Observations                                 | 629                                             | 634                                            | 633                                           | 624                                              |
| R-squared                                    | 0.204                                           | 0.048                                          | 0.056                                         | 0.131                                            |
| C. Sample focusing on non-founder CEOs       |                                                 |                                                |                                               |                                                  |
| Entrepreneur                                 | 0.794***<br>(0.0807)                            | 0.304***<br>(0.0819)                           | 0.263***<br>(0.0651)                          | 0.366***<br>(0.0610)                             |
| Non-founder CEO                              | 0.547***<br>(0.0862)                            | 0.152*<br>(0.0914)                             | 0.148**<br>(0.0669)                           | 0.249***<br>(0.0766)                             |
| Inventor employee                            | 0.142<br>(0.108)                                | -0.0320<br>(0.106)                             | -0.00481<br>(0.0807)                          | 0.204***<br>(0.0622)                             |
| Observations                                 | 856                                             | 861                                            | 860                                           | 851                                              |
| R-squared                                    | 0.185                                           | 0.039                                          | 0.042                                         | 0.112                                            |

Note: See Table S6a. Estimations include unreported explanatory variables.

Table S8a. Table S6a with inventor breakouts for non-employees

|                                      | Enjoy general risk,<br>measured on 5-<br>point scale | Enjoy financial risk,<br>measured on 5-<br>point scale | Entered the lottery<br>rather than taking<br>gift card |
|--------------------------------------|------------------------------------------------------|--------------------------------------------------------|--------------------------------------------------------|
| Entrepreneur: Inventor               | 0.744***<br>(0.114)                                  | 0.846***<br>(0.138)                                    | 0.0923<br>(0.0722)                                     |
| Entrepreneur: Non-Inventor           | 0.609***<br>(0.0898)                                 | 0.872***<br>(0.109)                                    | 0.125**<br>(0.0560)                                    |
| Non-founder CEO/leader: Inventor     | 0.440***<br>(0.142)                                  | 0.536***<br>(0.184)                                    | 0.103<br>(0.0909)                                      |
| Non-founder CEO/leader: Non-Inventor | 0.302***<br>(0.102)                                  | 0.452***<br>(0.118)                                    | 0.0892<br>(0.0569)                                     |
| Employee: Inventor                   | 0.133<br>(0.105)                                     | 0.264**<br>(0.109)                                     | 0.0489<br>(0.0520)                                     |
| Female                               | -0.254***<br>(0.0668)                                | -0.471***<br>(0.0737)                                  | -0.00483<br>(0.0355)                                   |
| Fulltime with company                | -0.0134<br>(0.0946)                                  | -0.0175<br>(0.119)                                     | -0.00387<br>(0.0534)                                   |
| Young (Under 35 years old)           | -0.0151<br>(0.0667)                                  | -0.0572<br>(0.0805)                                    | -0.0929**<br>(0.0377)                                  |
| Immigrant                            | 0.0814<br>(0.0702)                                   | 0.243***<br>(0.0773)                                   | 0.0211<br>(0.0406)                                     |
| Doctorate degree                     | -0.0360<br>(0.173)                                   | 0.290*<br>(0.173)                                      | 0.0610<br>(0.0805)                                     |
| Bachelors or masters degree          | -0.0498<br>(0.154)                                   | 0.198<br>(0.167)                                       | 0.0289<br>(0.0754)                                     |
| White                                | -0.00377<br>(0.0689)                                 | 0.128<br>(0.0834)                                      | 0.0929**<br>(0.0438)                                   |
| Highest degree in STEM field         | -0.00703<br>(0.0786)                                 | 0.0961<br>(0.0760)                                     | -0.0877**<br>(0.0413)                                  |
| Highest degree in business/econ      | 0.174**<br>(0.0778)                                  | 0.370***<br>(0.0864)                                   | -0.0247<br>(0.0397)                                    |
| Prior industry experience            | -0.0123<br>(0.0683)                                  | -0.0554<br>(0.0730)                                    | -0.0127<br>(0.0351)                                    |
| Constant                             | 3.647***<br>(0.203)                                  | 2.641***<br>(0.203)                                    | 0.581***<br>(0.0992)                                   |
| Observations                         | 948                                                  | 945                                                    | 874                                                    |
| R-squared                            | 0.127                                                | 0.230                                                  | 0.040                                                  |

Note: See Table S6a. Indicators for roles are measured relative to non-inventor employees. Standard errors are clustered by firm. \*\*\* p<0.01, \*\* p<0.05, \* p<0.1



Table S8b. Table S6b with inventor breakouts for non-employees

|                                      | Openness,<br>measured on 5-<br>point scale | Conscientiousness,<br>measured on 5-<br>point scale | Extraversion,<br>measured on 5-<br>point scale | Agreeableness,<br>measured on 5-<br>point scale | Neuroticism,<br>measured on 5-<br>point scale |
|--------------------------------------|--------------------------------------------|-----------------------------------------------------|------------------------------------------------|-------------------------------------------------|-----------------------------------------------|
| Entrepreneur: Inventor               | 0.518***<br>(0.118)                        | 0.0451<br>(0.131)                                   | 0.240<br>(0.163)                               | 0.0303<br>(0.117)                               | -0.298**<br>(0.127)                           |
| Entrepreneur: Non-Inventor           | 0.373***<br>(0.0781)                       | 0.0824<br>(0.0812)                                  | 0.216**<br>(0.0994)                            | 0.111<br>(0.0856)                               | -0.213**<br>(0.101)                           |
| Non-founder CEO/leader: Inventor     | 0.576***<br>(0.120)                        | 0.187<br>(0.128)                                    | 0.245<br>(0.176)                               | -0.0976<br>(0.145)                              | -0.0747<br>(0.168)                            |
| Non-founder CEO/leader: Non-Inventor | 0.0992<br>(0.0911)                         | 0.0543<br>(0.0864)                                  | -0.0269<br>(0.115)                             | -0.00488<br>(0.0787)                            | 0.0126<br>(0.110)                             |
| Employee: Inventor                   | 0.0773<br>(0.0888)                         | -0.0666<br>(0.0804)                                 | 0.105<br>(0.116)                               | -0.127<br>(0.0864)                              | -0.113<br>(0.107)                             |
| Female                               | 0.0111<br>(0.0541)                         | 0.230***<br>(0.0491)                                | 0.166**<br>(0.0659)                            | 0.118**<br>(0.0533)                             | 0.310***<br>(0.0650)                          |
| Fulltime with company                | 0.140<br>(0.0866)                          | 0.0154<br>(0.0731)                                  | 0.0177<br>(0.0890)                             | 0.0890<br>(0.0859)                              | 0.0580<br>(0.0971)                            |
| Young (Under 35 years old)           | -0.00968<br>(0.0542)                       | 0.0171<br>(0.0459)                                  | -0.0677<br>(0.0693)                            | 0.0476<br>(0.0539)                              | 0.170**<br>(0.0688)                           |
| Immigrant                            | -0.0288<br>(0.0561)                        | 0.0418<br>(0.0517)                                  | 0.0598<br>(0.0772)                             | -0.0392<br>(0.0589)                             | -0.0701<br>(0.0731)                           |
| Doctorate degree                     | -0.0281<br>(0.113)                         | 0.0331<br>(0.121)                                   | -0.199<br>(0.153)                              | 0.153<br>(0.139)                                | 0.0428<br>(0.134)                             |
| Bachelors or masters degree          | -0.0355<br>(0.109)                         | -0.0117<br>(0.105)                                  | -0.271*<br>(0.142)                             | 0.112<br>(0.129)                                | 0.109<br>(0.119)                              |
| White                                | 0.0203<br>(0.0547)                         | 0.0575<br>(0.0516)                                  | -0.0202<br>(0.0749)                            | -0.0226<br>(0.0591)                             | 0.00399<br>(0.0702)                           |
| Highest degree in STEM field         | -0.146**<br>(0.0610)                       | -0.0144<br>(0.0603)                                 | -0.423***<br>(0.0854)                          | -0.113*<br>(0.0658)                             | 0.00408<br>(0.0754)                           |
| Highest degree in business/econ      | -0.277***<br>(0.0667)                      | -0.0164<br>(0.0618)                                 | -0.0170<br>(0.0841)                            | -0.124*<br>(0.0715)                             | -0.0961<br>(0.0833)                           |
| Prior industry experience            | -0.0312<br>(0.0542)                        | 0.0869*<br>(0.0468)                                 | -0.149**<br>(0.0686)                           | -0.0508<br>(0.0516)                             | 0.0151<br>(0.0656)                            |
| Constant                             | 3.835***<br>(0.138)                        | 3.669***<br>(0.132)                                 | 3.732***<br>(0.169)                            | 3.900***<br>(0.160)                             | 2.297***<br>(0.164)                           |
| Observations                         | 911                                        | 914                                                 | 913                                            | 915                                             | 916                                           |
| R-squared                            | 0.073                                      | 0.034                                               | 0.061                                          | 0.027                                           | 0.077                                         |

Note: See Table S8a.

Table S8c. Table S6c with inventor breakouts for non-employees

|                                      | Self efficacy,<br>measured on 5-<br>point scale | Internal LOC,<br>measured on 5-<br>point scale | Need for<br>Achievement, on 5-<br>point scale | Innovativeness,<br>measured on 5-<br>point scale |
|--------------------------------------|-------------------------------------------------|------------------------------------------------|-----------------------------------------------|--------------------------------------------------|
| Entrepreneur: Inventor               | 0.747***<br>(0.119)                             | 0.280**<br>(0.133)                             | 0.305***<br>(0.107)                           | 0.586***<br>(0.0876)                             |
| Entrepreneur: Non-Inventor           | 0.847***<br>(0.0772)                            | 0.325***<br>(0.0801)                           | 0.282***<br>(0.0631)                          | 0.288***<br>(0.0638)                             |
| Non-founder CEO/leader: Inventor     | 0.571***<br>(0.133)                             | 0.247*<br>(0.135)                              | 0.147<br>(0.120)                              | 0.509***<br>(0.125)                              |
| Non-founder CEO/leader: Non-Inventor | 0.539***<br>(0.0836)                            | 0.171*<br>(0.0940)                             | 0.169**<br>(0.0691)                           | 0.109<br>(0.0737)                                |
| Employee: Inventor                   | 0.149<br>(0.108)                                | -0.0140<br>(0.107)                             | 0.0101<br>(0.0821)                            | 0.236***<br>(0.0620)                             |
| Female                               | -0.160**<br>(0.0620)                            | 0.0779<br>(0.0579)                             | 0.147***<br>(0.0427)                          | -0.120**<br>(0.0466)                             |
| Fulltime with company                | -0.112<br>(0.0837)                              | 0.0539<br>(0.0859)                             | 0.0864<br>(0.0671)                            | 0.102<br>(0.0664)                                |
| Young (Under 35 years old)           | 0.0496<br>(0.0693)                              | -0.114**<br>(0.0569)                           | -0.0471<br>(0.0450)                           | -0.0241<br>(0.0441)                              |
| Immigrant                            | 0.0742<br>(0.0606)                              | 0.0250<br>(0.0647)                             | -0.0220<br>(0.0532)                           | -0.0334<br>(0.0477)                              |
| Doctorate degree                     | 0.324*<br>(0.177)                               | -0.173<br>(0.126)                              | -0.111<br>(0.100)                             | 0.204**<br>(0.101)                               |
| Bachelors or masters degree          | 0.186<br>(0.174)                                | -0.113<br>(0.105)                              | -0.0287<br>(0.0813)                           | 0.122<br>(0.0966)                                |
| White                                | -0.0168<br>(0.0640)                             | 0.0671<br>(0.0601)                             | 0.0649<br>(0.0542)                            | 0.0774<br>(0.0513)                               |
| Highest degree in STEM field         | 0.0513<br>(0.0707)                              | 0.0781<br>(0.0715)                             | 0.0309<br>(0.0541)                            | -0.0746<br>(0.0499)                              |
| Highest degree in business/econ      | 0.195**<br>(0.0802)                             | 0.102<br>(0.0677)                              | -0.0633<br>(0.0553)                           | -0.126**<br>(0.0557)                             |
| Prior industry experience            | 0.0594<br>(0.0616)                              | 0.0228<br>(0.0622)                             | -0.00565<br>(0.0432)                          | -0.0273<br>(0.0434)                              |
| Constant                             | 3.527***<br>(0.197)                             | 4.183***<br>(0.147)                            | 4.284***<br>(0.114)                           | 3.274***<br>(0.115)                              |
| Observations                         | 911                                             | 916                                            | 915                                           | 905                                              |
| R-squared                            | 0.197                                           | 0.044                                          | 0.046                                         | 0.124                                            |

Note: See Table S8a.

## Survey Instrument

*Note: This has been edited to include only questions relevant to this analysis. It has been indicated below where questions have been removed. For a full version of the survey instrument, please see Kerr & Kerr (2018) or contact wkerr@hbs.edu.*

1. Please characterize your position in the company you are most involved with at CIC.

\*This question requires an answer in order to start the survey\*

- Employee (1)
- Founder and/or CEO (2)
- Owner (3)
- Other (e.g. board member, advisor) (4)

2. Is this position full-time or part-time?

- Full-time (1)
- Part-time (2)

### Experience with CIC

3. How long have you cumulatively been a client at CIC?

- < 6 months (1)
- 6-18 months (2)
- 18-36 months (3)
- 3-5 years (4)
- 5+ years (5)

4 How long do you plan to stay at CIC?

- < 6 months (1)
- 6-18 months (2)
- 18-36 months (3)
- 3-5 years (4)
- 5+ years (5)

### **Display the following questions for clients in MA (Cambridge and Boston)**

5. Which building are you currently located in?

- 50 Milk Street (1)
- 1 Broadway (2)
- 101 Main Street (3)

Display This Question:

*If "Which building are you currently located in?" "50 Milk Street" Is Selected*

6. Which floor are you located on?

- Floor 5 (1)
- Floor 11 (2)
- Floor 12 (3)
- Floor 14 (4)
- Floor 15 (5)
- Floor 16 (6)
- Floor 17 (7)
- Floor 18 (8)

*If "Which building (and floor) are you currently located in?" "1 Broadway" Is Selected*

7. Which floor are you located on?

- Floor 3 (1)
- Floor 4 (2)
- Floor 5 (3)
- Floor 7 (4)
- Floor 9 (5)
- Floor 11 (6)
- Floor 14 (7)

*If "Which building are you currently located in?" "101 Main Street" Is Selected*

8. Which floor are you located on?

- Floor 1 (1)
- Floor 14 (2)
- Floor 15 (3)

**Display the following question for clients in St. Louis**

9. Which building are you currently located in?

- CET - Doris (1)
- CET - Lab (2)
- CIC@4240 (3)

*\*\*Questions have been removed here which asked about the client's experience at CIC, networking behaviors, and preferences about future locations.*

**Display the following questions for all clients**

**Respondent Characteristics**

10. What is your age?

- Under 25 (1)
- 25-34 (2)
- 35-44 (3)
- 45-54 (4)
- over 55 (5)
- Prefer not to say (6)

11. What is your gender?

- Male (1)
- Female (2)
- Non-binary / genderqueer (3)
- Prefer to self-describe: (4) \_\_\_\_\_
- Prefer not to say (5)

12. Were you born in the United States?

- Yes (1)
- No (2)
- Prefer not to say (3)

13. What is your race / ethnicity? Mark all that apply

- American Indian or Alaska Native (1)
- Asian (2)
- Black or African American (3)
- Hispanic/Latino/Spanish origin (4)
- Native Hawaiian or Pacific Islander (5)
- White (6)
- Other (7)
- Prefer to self-describe: (8) \_\_\_\_\_
- Prefer not to say (9)

14. Highest level of education

- No college education (1)
- Some college education (2)
- BA or equivalent degree (3)
- MA or equivalent degree (4)
- Doctorate or equivalent degree (5)

15. Field of highest degree:

- STEM field (1)
- Business or Economics (2)
- Other field (3)

16. Prior industry experience: Have you previously worked in the same industry as the current firm?

- Yes (1)
- No (2)

17. Prior start-up experience: Have you previously worked in a startup?

- Yes (1)
- No (2)

18. Prior start-up experience: Have you previously founded a business?

- Yes (1)
- No (2)

19. How many firms have you founded? (Previous or concurrent startups)

- 1 (1)
- 2 (2)
- 3 (3)
- 4 (4)
- 5 (5)
- 6 (6)
- 7 (7)
- 8 (8)
- 9 (9)
- 10 (10)
- >10 (11)

**Display the following questions only for clients who have responded that they are Founder and/or CEO, Owner, or Other**

**Owner, Founder, or CEO Expectations**

20. Facts about the current business: Number of employees

- 1 (1)
- 2 (2)
- 3 (3)
- 4 (4)
- 5 (5)
- 6-10 (6)
- 11-20 (7)
- 21-50 (8)
- More than 50 (9)

21. Your expectations regarding the future of this new firm. What would you expect the total sales, revenues, or fees to be in 5 years' time (from now)?

- Smaller than now (1)
- Same as now (2)
- Larger than now (3)
- More than 5 times larger than now (4)

22. In 5 years' time, how do you expect the company's employment to change in FTE?

- Smaller than now (1)
- Same as now (2)
- Larger than now (3)
- More than 5 times larger than now (4)

*\*\*Questions have been removed here which asked about sources of capital used to finance the firm.*

### **Financing**

23. In total, how much external capital has been raised?

- Less than \$250k (1)
- \$250k - \$900k (2)
- \$900k - \$3m (3)
- \$3m - \$9m (4)
- More than \$9m (5)

### **Display the following questions for all clients**

#### **Innovation**

24. Have you ever been an inventor on a patent?

- Yes (1)
- No (2)

25. Has your company worked on (or is currently working on) a new innovation?

- Yes (1)
- No (2)

#### **Display This Question:**

*If "Has your company worked on (or is currently working on) a new innovation?" "Yes" Is Selected*

26. Does your company patent these innovations?

- No (1)
- Yes, it already has some patents (2)
- Yes, it intends to patent in future (none yet) (3)

*\*\*Questions have been removed here which asked about the impact of other CIC clients on the firm.*

**The next and final section uses personality assessment tools. It takes 3 minutes to complete.**

**Personality**

27. How much do you typically enjoy taking risks?

(1= not at all happy to take risks; 10= very happy to take risks)

- 1 (not at all happy to take risks) (1)
- 2 (2)
- 3 (3)
- 4 (4)
- 5 (5)
- 6 (6)
- 7 (7)
- 8 (8)
- 9 (9)
- 10 (very happy to take risks) (10)

28. Some activities involve a "financial" risk, such as starting a business, investing, or gambling and betting — that is, there is a risk of losing money or other assets. In general, what is your propensity for accepting financial risks?

(1= very low; 10= very high)

- 1 (very low) (1)
- 2 (2)
- 3 (3)
- 4 (4)
- 5 (5)
- 6 (6)
- 7 (7)
- 8 (8)
- 9 (9)
- 10 (very high) (10)



How do the following statements agree with you? (1= strongly disagree; 5= strongly agree)

|                                                                                                                | 1<br>Strongly<br>Disagree | 2 | 3 | 4 | 5<br>Strongly<br>Agree |
|----------------------------------------------------------------------------------------------------------------|---------------------------|---|---|---|------------------------|
| 29. I am talkative                                                                                             | 0                         | 0 | 0 | 0 | 0                      |
| 30. I am very thoughtful in my actions                                                                         | 0                         | 0 | 0 | 0 | 0                      |
| 31. I am original, come up with new ideas                                                                      | 0                         | 0 | 0 | 0 | 0                      |
| 32. I am reserved                                                                                              | 0                         | 0 | 0 | 0 | 0                      |
| 33. I am relaxed, handle stress well                                                                           | 0                         | 0 | 0 | 0 | 0                      |
| 34. I have a forgiving nature                                                                                  | 0                         | 0 | 0 | 0 | 0                      |
| 35. I get nervous easily and worry                                                                             | 0                         | 0 | 0 | 0 | 0                      |
| 36. I have an active imagination                                                                               | 0                         | 0 | 0 | 0 | 0                      |
| 37. I am often lazy                                                                                            | 0                         | 0 | 0 | 0 | 0                      |
| 38. I value artistic, aesthetic experiences                                                                    | 0                         | 0 | 0 | 0 | 0                      |
| 39. I am kind and considerate to others                                                                        | 0                         | 0 | 0 | 0 | 0                      |
| 40. I do things efficiently                                                                                    | 0                         | 0 | 0 | 0 | 0                      |
| 41. I am social and outgoing                                                                                   | 0                         | 0 | 0 | 0 | 0                      |
| 42. If I work hard, I can successfully start a business                                                        | 0                         | 0 | 0 | 0 | 0                      |
| 43. Overall, my skills and abilities will help me start a business                                             | 0                         | 0 | 0 | 0 | 0                      |
| 44. My past experience will be very valuable in starting a business                                            | 0                         | 0 | 0 | 0 | 0                      |
| 45. I am confident I can put forth the effort needed to start a business                                       | 0                         | 0 | 0 | 0 | 0                      |
| 46. I feel a great deal of pride when I complete a project successfully                                        | 0                         | 0 | 0 | 0 | 0                      |
| 47. I have a strong desire to achieve positive results even when it requires a great deal of additional effort | 0                         | 0 | 0 | 0 | 0                      |
| 48. I surprise people with my novel ideas                                                                      | 0                         | 0 | 0 | 0 | 0                      |
| 49. People ask me for help in creative activities                                                              | 0                         | 0 | 0 | 0 | 0                      |
| 50. I obtain more satisfaction from mastering a skill than coming up with a new idea                           | 0                         | 0 | 0 | 0 | 0                      |
| 51. I prefer work that requires original thinking                                                              | 0                         | 0 | 0 | 0 | 0                      |
| 52. I am not a very creative person                                                                            | 0                         | 0 | 0 | 0 | 0                      |

*\*\*Questions have been removed here related to business contacts and interest in future events. There was also an opportunity to provide any additional comments.*

53. All respondents can either choose to receive a \$5 Amazon gift card, or to participate in a drawing for a \$2,000 gift card of choice. We expect to receive around 1000 participants in the drawing. Your email will only be used for this purpose, and no additional questions or other contact attempts will be made using the email address provided below.

Please make your choice:

- Please send me a \$5 Amazon gift card. My email is (1) \_\_\_\_\_
- Please enter me in a drawing for the \$2,000 gift card. My email is (2) \_\_\_\_\_
